# Supplementary material for: Functional impairment and disability among patients with migraine: evaluation of galcanezumab in a long-term, open-label study
Source: Springer Nature journal article supplement (doi:10.1007/s11136-020-02632-0), 2020-09-17
Supplement: MOESM1 [file 18390008]

# **Functional Impairment and Disability among Patients with Migraine: Evaluation of Galcanezumab in a Long-Term, Open-Label Study**

**Journal:** Quality of Life Research

<sup>1</sup>Janet H. Ford, <sup>1</sup>Virginia L. Stauffer, <sup>2</sup>Peter McAllister, <sup>3</sup>Sreelatha Akkala, <sup>1</sup>Matthew Sexson,

<sup>1</sup>David W. Ayer, <sup>1</sup>Shufang Wang

<sup>1</sup>Eli Lilly and Company, Indianapolis, IN, USA

<sup>2</sup>New England Institute for Neurology and Headache, Stamford, USA

<sup>3</sup>Eli Lilly Services India Pvt Ltd, Bengaluru, India

## **Corresponding Author:**

Janet H. Ford

Eli Lilly and Company

893 S. Delaware Street

Indianapolis, IN 46225, USA

Phone: 317-903-8199

Email: ford\_janet@lilly.com

*Supplementary material*

**Online resource: List of institutional review boards at each study site**

Commissie Medische Ethiek Universitair Ziekenhuis [Institutes: Clinique St. Joseph, Algemeen Ziekenhuis St Jan Brugge, Universitair Ziekenhuis Brussel; Belgium], IRB Services [Institutes: DIEX Recherche Sherbrooke, Inc., Stroyan Research; Canada], Conjoint Medical Ethics Committee [Institute: University of Calgary, Canada], CPP Sud Méditerranée V [Institutes: CHU St Etienne Hôpital Nord, Hôpital de la Timone, Hôpital de Cimiez, Hôpital Lariboisière; France], Egeszsegügyi Tudományos Tanács [Institutes: Országos Idegtudományi Intézet, Petz Aladar Megyei Oktató Kórház, SE Neurológiai Klinika, Valeomed Kft.; Hungary], Quorum Review, Inc. [Institutes: Wilmington Health Associates, Mercy Health Research, Blue Ridge Research Center, Jacksonville Center for Clinical Research, Ericksen Research and Development, Suburban Research Associates, California Medical Clinic for Headache, Albuquerque Neuroscience, Inc., ClinPoint Trials, LLC, Encompass Clinical Research, New England Institute for Clinical Research, Infinity Clinical Research, LLC, PharmQuest, Ponce School of Medicine CAIMED Center; USA]
